1 **Title: The molecular clock in long-lived tropical trees is independent of growth**  
2 **rate**

3  
4 **Authors: Ryosuke Imai<sup>1</sup>, Takeshi Fujino<sup>2</sup>, Sou Tomimoto<sup>1</sup>, Kayoko Ohta<sup>1</sup>, Mohammad**  
5 **Na'iem<sup>3</sup>, Sapto Indrioko<sup>3</sup>, Widiyatno<sup>3</sup>, Susilo Purnomo<sup>4</sup>, Almudena Mollá-Morales<sup>5</sup>, Viktoria**  
6 **Nizhynska<sup>5</sup>, Naoki Tani<sup>6,7</sup>, Yoshihisa Suyama<sup>8</sup>, Eriko Sasaki<sup>1</sup>, Masahiro Kasahara<sup>2</sup>, Akiko**  
7 **Satake<sup>1\*</sup>**

8  
9 **Affiliations:**

10 <sup>1</sup> Department of Biology, Faculty of Science, Kyushu University, Fukuoka 819-0395, Japan.

11 <sup>2</sup> Department of Computational Biology and Medical Sciences, Graduate School of Frontier Sciences,  
12 The University of Tokyo, 277-8561, Chiba, Japan.

13 <sup>3</sup> Faculty of Forestry, Universitas Gadjah Mada, Jl. Agro No. 1 Bulaksumur Yogyakarta 55281,  
14 Indonesia.

15 <sup>4</sup> PT. Sari Bumi Kusuma, Sungai Raya, Pontianak Kota, Pontianak, West Kalimantan 78391,  
16 Indonesia.

17 <sup>5</sup> Gregor Mendel Institute of Molecular Plant Biology, Austrian Academy of Sciences, Vienna  
18 BioCenter (VBC), Dr. Bohr-Gasse 3, 1030, Vienna, Austria.

19 <sup>6</sup> Forestry Division, Japan International Research Center for Agricultural Sciences, Tsukuba, Ibaraki,  
20 305-8686, Japan.

21 <sup>7</sup> Faculty of Life and Environmental Sciences, University of Tsukuba, Tsukuba, Ibaraki, 305-8686,  
22 Japan.

23 <sup>8</sup> Field Science Center, Graduate School of Agricultural Science, Tohoku University, 232-3  
24 Yomogida, Naruko-onsen, Osaki, Miyagi, 989-6711, Japan.

25

26 \*Correspondence to:

27 Akiko Satake (akiko.satake@kyudai.jp)

28

29 **The rates and patterns of somatic mutations in wild plants, as well as how they relate to**  
30 **longevity, are largely unknown<sup>1-3</sup>. Here, we examined the somatic mutation landscapes of slow-**  
31 **and fast-growing tropical species in central Borneo, Indonesia. Using newly-constructed**  
32 **genomes, we identified an average of 480 mutations in the slow-growing species (265-year-old,**  
33 **44.1 m in height), which was five times greater than that observed in the fast-growing species**  
34 **(66-year-old, 43.9 m). The number of somatic mutations increased linearly with branch length.**  
35 **The somatic mutation rate per meter was higher in the slow-growing species, yet the rate per**  
36 **year remained constant across both species. The mutational spectra exhibited a dominance of**  
37 **spontaneous mutations, specifically cytosine-to-thymine substitutions at CpG sites. An analysis**  
38 **of nucleotide substitutions at both the intra- and inter-individual level revealed that somatic**  
39 **mutations are neutral within an individual, but those mutations transmitted to the next**

40 **generation are subject to purifying selection. We developed a model to evaluate the relative**  
41 **contribution of cell division on mutational processes, and postulate that cell-division**  
42 **independent mutagenesis predominates. These findings deepen our understanding of**  
43 **mutational processes underlying the generation of genetic diversity in a tropical ecosystem.**

44 Biodiversity ultimately results from mutations that provide genetic variation for organisms to adapt  
45 to their environments. However, how and when mutations occur is poorly understood. Recent studies  
46 on somatic mutations that accumulate in long-lived trees have begun to uncover the rate of naturally  
47 occurring mutations and their relationship to longevity. The rate of somatic mutations per year in a  
48 234-year-old oak tree has been found to be surprisingly low<sup>4</sup> compared to the rate in an annual herb<sup>5</sup>.  
49 Similar analyses in other long-lived trees have also shown low mutation rates in both broadleaf trees<sup>6-</sup>  
50 <sup>10</sup> and conifers<sup>11</sup>, consistent with the recent finding in mammals that the rate of somatic mutations  
51 exhibits a strong inverse relationship with lifespan<sup>12</sup>.

52 Low mutation rates are advantageous to cope with deleterious mutation effects, such as  
53 aging<sup>13</sup> and mutational meltdown<sup>14,15</sup>. In contrast, low mutation rates reduce genetic variation and the  
54 rate of evolution because, unlike animals, somatic mutations in plants can be transmitted to offspring<sup>6</sup>.  
55 In tropical ecosystems, which are among the most diverse biomes on Earth, the role of somatic  
56 mutations in generating genetic variations can be more pronounced than in organisms living in higher  
57 latitudes<sup>16</sup>. However, there is currently no knowledge on the relationship between somatic mutation  
58 rate and lifespan in tropical organisms.

59 To investigate the rates and patterns of somatic mutation and their relation to lifespans in  
60 tropical organisms, we studied the somatic mutation landscapes of slow- and fast-growing tropical  
61 trees in a humid tropical rain forest of Southeast Asia. The comparative analysis of slow- and fast-  
62 growing species enables us to investigate the relationship between lifespan and mutagenesis because  
63 slow-growing trees have longer lifespans compared to their fast-growing counterparts<sup>17,18</sup>.

64

## 65 **Detecting somatic mutations in slow- and fast-growing tropical trees**

66 The humid tropical rainforests of Southeast Asia are characterized by a preponderance of trees of the  
67 Dipterocarpaceae family<sup>19</sup>. Dipterocarp trees are highly valued for both their contribution to forest  
68 diversity and their use in timber production. For the purposes of this study, we selected *Shorea laevis*  
69 and *S. leprosula*, both native hardwood species of the Dipterocarpaceae family (Extended Data Fig.  
70 1a). *S. laevis* is a slow-growing species<sup>20</sup>, with a mean annual increment (MAI) of diameter at breast  
71 height (DBH) of 0.38 cm/year (as measured over a 20 year period in  $n = 2$  individuals; Supplementary  
72 Table 1). In contrast, *S. leprosula* exhibits a faster growth rate, with an MAI of 1.21 cm/year ( $n = 18$ ;  
73 Supplementary Table 1), which is 3.2 times greater than that of *S. laevis*. We selected the two largest  
74 individuals of each species (S1 and S2 for *S.laevis* and F1 and F2 for *S. leprosula*; Fig. 1a) at the  
75 study site, located just below the equator in central Borneo, Indonesia (Extended Data Fig. 1b). We  
76 collected leaves from the apices of seven branches and a cambium from the base of the stem from  
77 each tree (Fig. 1a; Extended Data Fig. 2), resulting in a total of 32 samples. To determine the physical  
78 distance between the sampling positions, we measured the length of each branch (Supplementary  
79 Table 2) and DBH (Supplementary Table 3). The average heights of the slow- and fast-growing

80 species were 44.1 m and 43.9 m, respectively (Fig. 1a; Supplementary Table 3). While it is  
81 challenging to accurately estimate the age of tropical trees due to the absence of annual rings, we  
82 used the DBH/MAI to approximate the age of the trees to be, on average, 256 and 66-year-old for the  
83 slow- and fast-growing species, respectively (Supplementary Table 3).

84 To identify somatic mutations, we constructed new reference genomes of the slow- and fast-  
85 growing species. We generated sequence data using long-range PacBio RS II and short-read Illumina  
86 sequencing and assembled the genome using DNA extracted from the apical leaf at branch 1-1 of the  
87 tallest individual of each species (S1 and F1). The genomes were estimated to contain 52,935 and  
88 40,665 protein-coding genes, covering 97.9% and 97.8% of complete BUSCO genes  
89 (eudicots\_odb10) for the slow- and fast-growing species, respectively (Supplementary Table 4).  
90 Genome sizes estimated using k-mer distribution were 347 and 376 Mb for the slow- and fast-growing  
91 species, respectively.

92 To accurately identify somatic mutations, we extracted DNA from each sample twice to  
93 generate two biological replicates (Extended Data Fig. 2). A total of 64 DNA samples were sequenced,  
94 yielding an average coverage of 69.3 and 56.5× per sample for the slow- and fast-growing species,  
95 respectively (Supplementary Table 5). We identified Single Nucleotide Variants (SNVs) within the  
96 same individual by identifying those that were identical within two biological replicates of each  
97 sample (Extended Data Fig. 2). We identified 728 and 234 SNVs in S1 and S2, and 106 and 68 SNVs  
98 in F1 and F2, respectively (Extended Data Fig. 2; Supplementary Table 6). All somatic mutations  
99 were unique and did not overlap between individuals. Experimental validation of a subset of the  
100 inferred SNVs revealed that 93.9% were accurately annotated (Supplementary Table 7).

101

## 102 **Somatic mutations rates per year is independent of growth rate**

103 Phylogenetic trees constructed using somatic mutations were almost perfectly congruent with the  
104 physical tree structures (Fig. 1a). The majority of somatic mutations were present at a single branch,  
105 but we also identified somatic mutations present in multiple branches (Fig. 1b) which are likely  
106 transmitted to new branches during growth. Unlike previous studies<sup>7,8</sup>, we did not incorporate  
107 knowledge of the branching topology of the tree in the SNV discovery process. The strong  
108 concordance between the phylogenetic trees and physical tree structure in the absence of prior  
109 knowledge of tree branching topology suggests the reliability of the SNV detection pipelines  
110 developed in this study.

111 Our analysis revealed that the number of SNVs increases linearly as the physical distance  
112 between branches increases (Fig. 2a). The somatic mutation rate per site per meter was determined  
113 by dividing the slope of the linear regression of the number of SNVs against the physical distance  
114 between branches by the size of the reference genome (Fig. 2b). The average rate of somatic mutation  
115 per meter was  $7.63 \times 10^{-9} \text{ site}^{-1} \text{ m}^{-1}$  for the slow-growing species, which is 3.16-fold higher than the  
116 average rate of  $2.41 \times 10^{-9} \text{ site}^{-1} \text{ m}^{-1}$  observed in the fast-growing species (Fig. 2b; Supplementary  
117 Table 8). This result indicates that the slow-growing tree accumulates more *de novo* somatic  
118 mutations compared to the fast-growing tree to grow the unit length. This cannot be explained by  
119 differences in the number of cell divisions, as the length and diameter of fiber cells in both species

120 are not significantly different (1.29 mm and 19.0  $\mu\text{m}$  for the slow-growing species<sup>21</sup> and 0.91mm and  
121 22.7  $\mu\text{m}$  for the fast-growing species<sup>22</sup>).

122 Based on the estimated age of each tree, somatic mutation rates per site per year were  
123 calculated for each tree. On average, resultant values were largely similar between the two species,  
124 with  $1.24 \times 10^{-9}$  and  $1.40 \times 10^{-9}$  site<sup>-1</sup> year<sup>-1</sup> for the slow- and fast-growing species, respectively (Fig.  
125 2b; Supplementary Table 8). This result suggests that somatic mutation accumulates in a clock-like  
126 manner as they age regardless of tree growth. Our estimates of somatic mutation rates per site per  
127 year in *Shorea* are significantly higher than those previously reported in other long-lived trees such  
128 as *Quercus robur*<sup>4</sup> ( $1.79\text{--}2.22 \times 10^{-10}$ ), *Populus trichocarpa*<sup>9</sup> ( $1.33 \times 10^{-10}$ ), *Eucalyptus melliodora*<sup>8</sup>  
129 ( $1.16\text{--}11.2 \times 10^{-10}$ ) and *Picea sitchensis*<sup>11</sup> ( $7.4 \times 10^{-11}$ ). The somatic mutation rates of tropical trees  
130 were on the same order of magnitude as those of the annual herb *Arabidopsis thaliana*<sup>5</sup> ( $7.1 \times 10^{-9}$   
131 per generation). This suggests that long-lived trees in the tropics do not necessarily suppress somatic  
132 mutation rates to the same extent as their temperate counterparts.

133

### 134 **Mutational spectra are similar between slow- and fast-growing trees**

135 Somatic mutations may be caused by exogenous factors such as ultraviolet and ionizing radiation, or  
136 endogenous factors such as oxidative respiration and errors in DNA replication. To identify  
137 characteristic mutational signatures caused by different mutagenic factors, we characterized  
138 mutational spectra by calculating the relative frequency of mutations at the 96 triplets defined by the  
139 mutated base and its flanking 5' and 3' bases (Fig. 3; Extended Data Fig. 3). Across species, the  
140 mutational spectra showed a dominance of cytosine-to-thymine (C>T and G>A on the other strand,  
141 noted as C:G>T:A) substitutions at CpG sites with CG (Fig. 3a, b). This is believed to result from the  
142 spontaneous deamination of 5-methylcytosine<sup>23,24</sup>. Methylated CpG sites spontaneously deaminate,  
143 leading to TpG sites and increasing the number of C>T substitutions<sup>25</sup>.

144 We compared the mutational spectra of our tropical trees to single-base substitution (SBS)  
145 signatures in human cancers using the Catalogue Of Somatic Mutations In Cancer (COSMIC)  
146 compendium of mutation signatures (COSMICv.2<sup>26-28</sup>). The mutational spectra were largely similar  
147 to the dominant mutation signature in human cancers known as SBS1 (cosine similarity = 0.789 and  
148 0.597 for the slow- and fast-growing species; Supplementary Table 9). SBS1 is believed to result  
149 from the spontaneous deamination of 5-methylcytosine. The mutational spectra were also comparable  
150 to another dominant signature in human cancers, SBS5 (cosine similarity = 0.577 and 0.558 for the  
151 slow- and fast-growing species; Supplementary Table 9), the origin of which remains unknown. Our  
152 finding that somatic mutations in tropical trees accumulate in a clock-like manner (Fig. 2a) is  
153 consistent with the clock-like mutational process observed in SBS1 and SBS5 in human somatic  
154 cells<sup>29,30</sup>. This suggests that the mutational processes in plants and animals are conserved, despite the  
155 variation in their life forms and environmental conditions.

156

### 157 **Somatic mutations are neutral but inter-individual SNVs are subject to selection**

158 We tested whether the somatic mutations are subject to selection (Fig. 4a). The observed rate of non-  
159 synonymous somatic mutations did not deviate significantly from the expected rate under the null

160 hypothesis of neutral selection in both the slow- (binomial test:  $P = 0.71$ ) and fast-growing (binomial  
161 test:  $P = 1.0$ ) species (Fig. 4b; Supplementary Table 10). In contrast, the number of inter-individual  
162 SNVs were significantly smaller than expected ( $P < 10^{-15}$  for both species: Fig. 4c). These results  
163 indicate that somatic mutations are largely neutral within an individual, but mutations passed to next  
164 generation are subject to strong purifying selection during the process of embryogenesis, seed  
165 germination and growth.

166 Overall, the mutational spectra were similar between somatic and inter-individual SNVs  
167 (Extended Data Fig. 3). However, the fraction of C>T substitutions, in particular at CpG sites, was  
168 lower in inter-individual SNVs compared to somatic SNVs (Fig. 4d). This observation may be  
169 indicative of the potential influence of GC-biased gene conversion during meiosis<sup>31</sup> or biased  
170 purifying selection for C>T inter-individual nucleotide substitutions.

171

## 172 Discussion

173 Our study demonstrates that while the somatic mutation rate per meter is higher in the slow- than in  
174 fast-growing species, the somatic mutation rate per year is independent of growth rate. To gain deeper  
175 understanding of these findings, we developed a simple model that decomposes the mutation rate per  
176 site per cell division ( $\mu$ ) into the two components: cell-division dependent ( $\alpha$ ) and cell-division  
177 independent ( $\beta$ ) mutagenesis. This can be represented as  $\mu = \alpha + \beta\tau$ , where  $\tau$  is the duration of cell  
178 cycle measured in years. The cell-division dependent mutation emanates from errors that occur during  
179 DNA replication, such as the misincorporation of a nucleotide during DNA synthesis. The cell-  
180 division independent mutation arises from DNA damage caused by endogenous reactions or  
181 exogenous mutagens at any time of cell cycle. Since the number of cell division per year is given as  
182  $r = 1/\tau$ , the mutation rate per year becomes  $r\mu = \alpha/\tau + \beta$ . From the relationship, the number of  
183 nucleotide substitution per site accumulated over  $t$  years, denoted as  $m(t)$ , is given by:

184

$$185 \quad m(t) = (\alpha/\tau + \beta)t.$$

186

187 The above formula encompasses the effects from two distinct sources of somatic mutations: cell-  
188 division dependent ( $\alpha/\tau$ ) and cell-division independent (i.e., time-dependent) mutagenesis ( $\beta$ ). When  
189  $\beta$  is significantly greater than  $\alpha$ , the rate of somatic mutation accumulation becomes constant,  
190 independent of growth rate.

191 We estimated the relative magnitudes of  $\alpha$  and  $\beta$  by using the results obtained from our  
192 study. Given that the cell cycle duration is likely inversely proportional to MAI, we have  $\tau_S/\tau_F = 3.2$   
193 (Supplementary Table 1), where  $\tau_S$  and  $\tau_F$  denote the cell cycle duration for the slow- and fast-  
194 growing species, respectively. It is also reasonable to assume that the same number of cell divisions  
195 are required to achieve 1 m of growth in both species as the cell size is similar between the two  
196 species. Based on our estimates of the somatic mutation rate per site per meter for the slow- ( $\mu_S$ ) and  
197 fast-growing species ( $\mu_F$ ), we have  $\mu_S/\mu_F = (\alpha + \beta\tau_S)/(\alpha + \beta\tau_F) = 3.16$ , which is nearly equivalent  
198 to the ratio of cell cycle duration  $\tau_S/\tau_F$ . This consistency can be explained by the substantial  
199 contribution of the cell-division independent mutagenesis (i.e.  $\beta \gg \alpha$ ) to the somatic mutation rate,

200 as long as the magnitudes for  $\alpha$  and  $\beta$  are similar between the two species. The relative contribution  
201 of cell-division dependent to cell-division independent mutagenesis ( $\alpha/\beta$ ) can be estimated as 0.015,  
202 a significantly small value. This suggests that the cell-division independent mutagenesis has a greater  
203 impact on the overall somatic mutation rate than the cell-division dependent mutagenesis.

204 DNA replication and cell division have long been assumed to be major sources of somatic  
205 mutations. Nevertheless, our study demonstrates that cell-division independent mutagenesis  
206 predominates in tropical trees. This finding concords with a recent report on somatic mutations in  
207 human, which showed that dominant mutational processes can occur independently of cell division<sup>32</sup>.  
208 The preponderance of non-replicative mutational process can be attributed to its distinct molecular  
209 origin, specifically the accumulation of spontaneous transitions at CpG sites over time. The  
210 dominance of endogenous mutational process leads to a molecular clock, a constant rate of molecular  
211 evolution<sup>33,34</sup>.

212 In trees, somatic mutations can be transmitted to numerous seeds, resulting in a rich genetic  
213 variation that can facilitate the effectiveness of natural selection to subsequent generations. The high  
214 rate of somatic mutations observed in long-lived tropical trees suggests that these mutations may play  
215 a more significant role in plant evolution than previously thought. The humid tropical rainforests of  
216 Southeast Asia, which are renowned for their high species diversity, are currently facing threats from  
217 deforestation and climate change. Our study suggests that the conservation of long-lived trees is  
218 crucial for preserving their evolutionary potential and sustaining ecosystem function.

219

## 220 References

- 221 1. Whitham, T. G. & Slobodchikoff, C. N. Evolution by individuals, plant-herbivore  
222 interactions, and mosaics of genetic variability: The adaptive significance of somatic  
223 mutations in plants. *Oecologia* **49**, 287–292 (1981).
- 224 2. Gill, D.E. *et al.* Genetic mosaicism in plants and clonal animals. *Annu. Rev. Ecol. Evol. Syst.*  
225 **26**, 423–444 (2009).
- 226 3. Schoen, D. J. & Schultz, S. T. Somatic mutation and evolution in plants. *Annu. Rev. Ecol.*  
227 *Evol. Syst.* **50**, 49–73 (2019).
- 228 4. Schmid-Siegert, E. *et al.* Low number of fixed somatic mutations in a long-lived oak tree.  
229 *Nat. Plants* **3**, 926–929 (2017).
- 230 5. Ossowski, S. *et al.* The rate and molecular spectrum of spontaneous mutations in *Arabidopsis*  
231 *thaliana*. *Science* **327**, 92–94 (2010).
- 232 6. Plomion, C. *et al.* Oak genome reveals facets of long lifespan. *Nat. Plants* **4**, 440–452  
233 (2018).
- 234 7. Wang, L. *et al.* The architecture of intra-organism mutation rate variation in plants. *PLoS*  
235 *Biol.* **17**, 1–29 (2019).
- 236 8. Orr, A. J. *et al.* A phylogenomic approach reveals a low somatic mutation rate in a long-lived  
237 plant. *Proc. R. Soc. B Biol. Sci.* **287**, (2020).
- 238 9. Hofmeister, B. T. *et al.* A genome assembly and the somatic genetic and epigenetic mutation  
239 rate in a wild long-lived perennial *Populus trichocarpa*. *Genome Biol.* **21**, 1–27 (2020).

- 240 10. Duan, Y. *et al.* Limited accumulation of high-frequency somatic mutations in a 1700-year-  
241 old *Osmanthus fragrans* tree. *Tree Physiol.* **42**, 2040–2049 (2022).
- 242 11. Hanlon, V. C. T., Otto, S. P. & Aitken, S. N. Somatic mutations substantially increase the  
243 per-generation mutation rate in the conifer *Picea sitchensis*. *Evol. Lett.* **3**, 348–358 (2019).
- 244 12. Cagan, A. *et al.* Somatic mutation rates scale with lifespan across mammals. *Nature* **604**,  
245 517–524 (2022).
- 246 13. Larsson, N. G. Somatic mitochondrial DNA mutations in mammalian aging. *Annu. Rev.*  
247 *Biochem.* **79**, 683–706 (2010).
- 248 14. Klekowski, E. J. Plant clonality, mutation, diplontic selection and mutational meltdown. *Biol.*  
249 *J. Linn. Soc.* **79**, 61–67 (2003).
- 250 15. Lynch, M., Butcher, D., Bürger, R. & Gabriel, W. The mutational meltdown in asexual  
251 populations. *J. Hered.* **84**, (1993).
- 252 16. Rohde, K. Latitudinal gradients in species diversity : The search for the primary cause. *Oikos*  
253 **65**, 514–527 (1992).
- 254 17. Johnson, S. E. & Abrams, M. D. Age class, longevity and growth rate relationships:  
255 Protracted growth increases in old trees in the eastern United States. *Tree Physiol.* **29**, 1317–  
256 1328 (2009).
- 257 18. Black, B. A., Colbert, J. J. & Pederson, N. Relationships between radial growth rates and  
258 lifespan within North American tree species. *Ecoscience* **15**, 349–357 (2008).
- 259 19. Ghazoul, J. *Dipterocarp Biology, Ecology, and Conservation*. (Oxford University Press,  
260 2016).
- 261 20. Widiyatno *et al.* Early performance of 23 dipterocarp species planted in logged-over  
262 rainforest. *J. Trop. For. Sci.* **26**, 259–266 (2014).
- 263 21. Usami, K. Tropical woods as pulp stuffs. *J. Agric. Res. Q.* **12**, 109–114 (1978).
- 264 22. Praptoyo, H. & Mayaningsih, R. Anatomical features of wood from some fast growing red  
265 meranti. *Proceeding 4th Int. Symp. IWoRs* **7**, 8 (2012).
- 266 23. Colouandre, C. *et al.* Molecular basis of base substitution hotspots in *Escherichia coli*. *Nature*  
267 **274**, 568–571 (1978).
- 268 24. Duncan, B. K. & Miller, J. H. Mutagenic deamination of cytosine residues in DNA. *Nature*  
269 **287**, 560–561 (1980).
- 270 25. Cooper, D. N. & Krawczak, M. Cytosine methylation and the fate of CpG dinucleotides in  
271 vertebrate genomes. *Hum. Genet.* **83**, 181–188 (1989).
- 272 26. Alexandrov, L. B. *et al.* Deciphering Signatures of Mutational Processes Operative in Human  
273 Cancer. *Cell Rep.* **3**, 246–259 (2013).
- 274 27. Nik-Zainal, S. *et al.* Landscape of somatic mutations in 560 breast cancer whole-genome  
275 sequences. *Nature* **534**, 47–54 (2016).
- 276 28. Alexandrov, L. B. *et al.* The repertoire of mutational signatures in human cancer. *Nature*  
277 **578**, 94–101 (2020).
- 278 29. Alexandrov, L. B. *et al.* Clock-like mutational processes in human somatic cells Europe. *Nat*  
279 *Genet* **47**, 1402–1407 (2015).

- 280 30. Lee-Six, H. *et al.* The landscape of somatic mutation in normal colorectal epithelial cells.  
281 *Nature* **574**, 532–537 (2019).
- 282 31. Duret, L. & Galtier, N. Biased gene conversion and the evolution of mammalian genomic  
283 landscapes. *Annu. Rev. Genomics Hum. Genet.* **10**, 285–311 (2009).
- 284 32. Abascal, F. *et al.* Somatic mutation landscapes at single-molecule resolution. *Nature* **593**,  
285 405–410 (2021).
- 286 33. Zuckerkandl, E. & Pauling, L. *Evolving Genes and Proteins*. (Academic Press, 1965).
- 287 34. Kimura, M. & Ohta, T. On the rate of molecular evolution. *J. Mol. Evol.* **1**, 1–17 (1971).
- 288
- 289



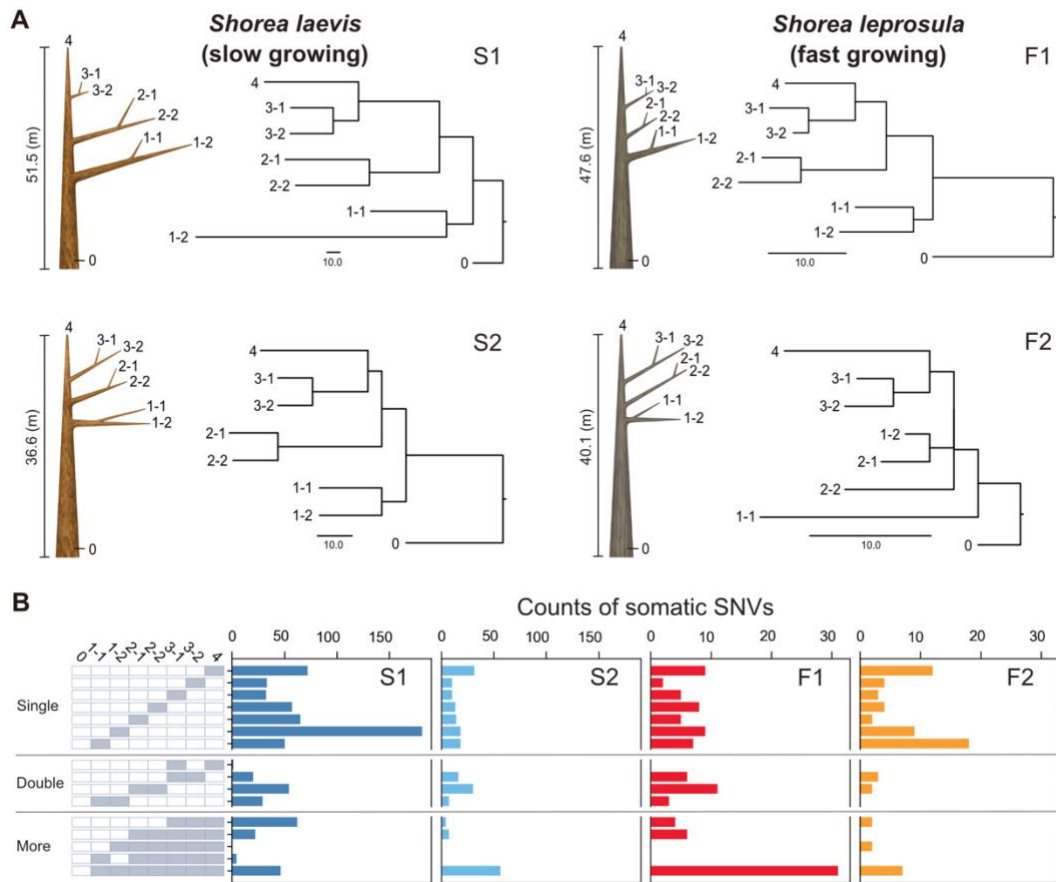

290

291 **Fig. 1 | Physical tree structures and phylogenetic trees constructed from somatic mutations. a,**  
 292 Comparisons of physical tree structures (left, branch length in meters) and neighbor-joining (NJ) trees  
 293 (right, branch length in the number of nucleotide substitutions) in two tropical tree species: *S. laevis*,  
 294 a slow-growing species (S1 and S2), and *S. leprosula*, a fast-growing species (F1 and F2). IDs are  
 295 assigned to each sample from which genome sequencing data were generated. Vertical lines represent  
 296 tree heights. **b,** Distribution of somatic mutations within tree architecture. A white and gray panel  
 297 indicates the presence (gray) and absence (white) of somatic mutation in each of eight samples  
 298 compared to the genotype of sample 0. Sample IDs are the same between panels **a** and **b**. The  
 299 distribution pattern of somatic mutations is categorized as Single, Double, and More depending on  
 300 the number of samples possessing the focal somatic mutations. Among  $2^7 - 1$  possible distribution  
 301 patterns, the patterns observed in at least one of the four individuals are shown.

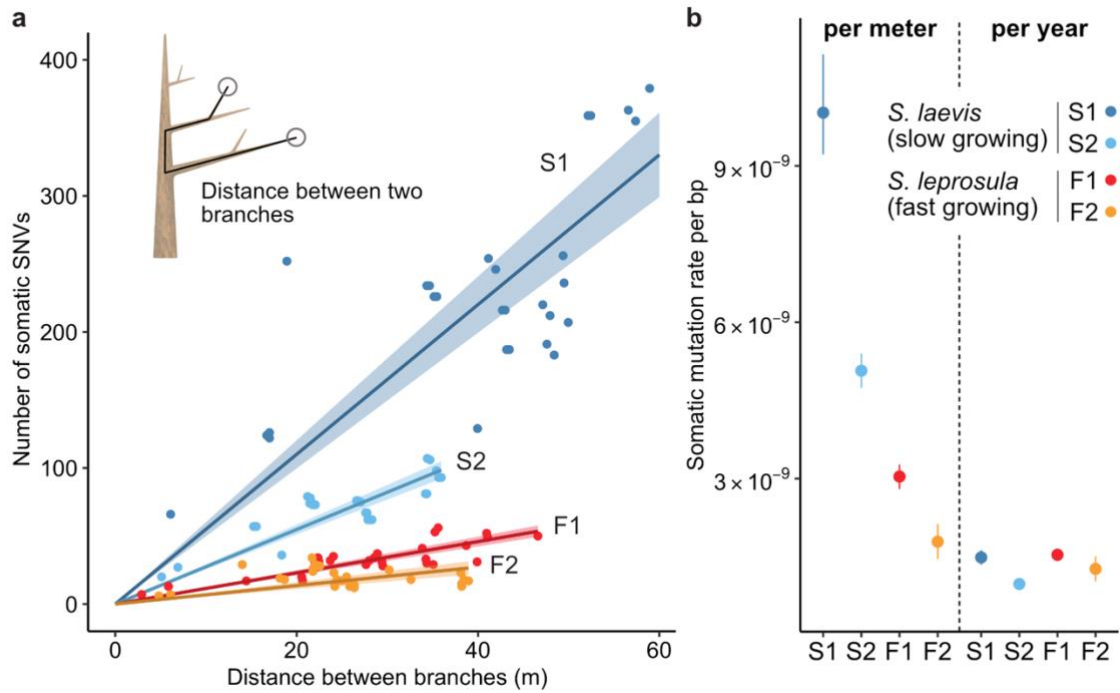

302

303 **Fig. 2 | The relationship between the physical distance and the numbers of SNVs. a**, Linear  
304 regression of the number of SNVs against the pair-wise distance between branches with an intercept  
305 of 0 for each tree (S1: blue, S2: right blue, F1: red, and F2: orange). Shaded areas represent 95%  
306 confidence intervals of regression lines. Regression coefficients are listed in Supplementary Table 8.  
307 **b**, Comparison of somatic mutation rates per site to grow 1 m and per year across four tropical trees.  
308 Bars indicate 95% confidence intervals.

309

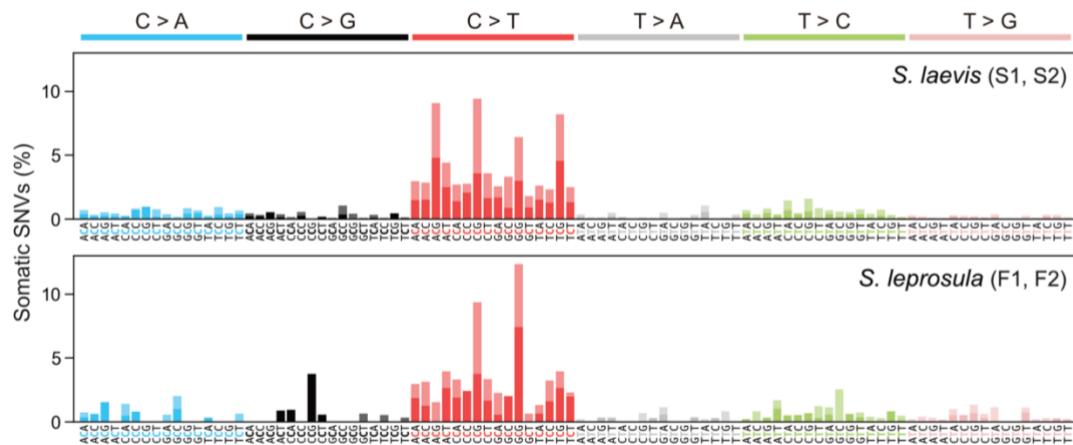

310

311 **Fig. 3 | Mutational spectra of somatic SNVs.** Somatic mutation spectra in *S. laevis* (upper panel)  
312 and *S. leprosula* (lower panel). The horizontal axis shows 96 mutation types on a trinucleotide  
313 context, coloured by base substitution type. Different colours within each bar indicate complementary  
314 bases. For each species, the data from two trees (S1 and S2 for *S. laevis* and F1 and F2 for *S. leprosula*)  
315 were pooled to calculate the fraction of each mutated triplet.

316

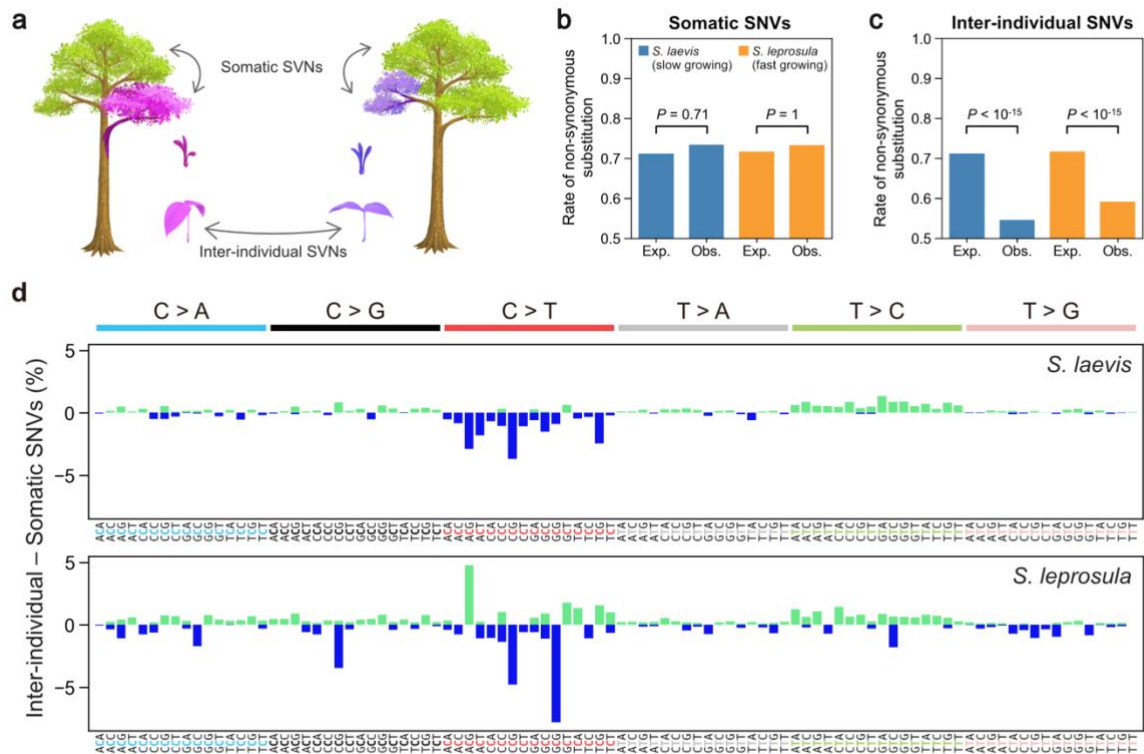

317

318

319

320

321

322

323

324

325

326

**Fig. 4 | Detecting selection on somatic and inter-individual SNVs.** **a**, An illustration of somatic and inter-individual SNVs. Different colours indicate different genotypes. **b**, Expected (Exp.) and observed (Obs.) rates of somatic non-synonymous substitutions. **c**, Expected (Exp.) and observed (Obs.) rates of inter-individual non-synonymous substitutions. **d**, The difference between the fractions of inter-individual and somatic substitutions spectra in *S. laevis* (upper panel) and *S. leprosula* (lower panel). The positive and negative values are plotted in different colours. The horizontal axis shows 96 mutation types on a trinucleotide context, coloured by base substitution type.

## 327 **Methods**

### 328 **Study site and sampling methods**

329 The study site is in a humid tropical rain forest in Central Borneo, Indonesia (00°49' 45.7" S, 112°00'  
330 09.5" E; Extended Data Fig. 1b). The forest is characterized by a prevalence of trees of the  
331 Dipterocarpaceae family and is managed through a combination of selective logging and line planting  
332 (Tebang Pilih Tanam Jalur, TPTJ). The mean annual temperature range from 2001 to 2009 was  
333 between 22 to 28°C at night and 30 to 33°C during the day, with an average annual precipitation of  
334 3376 mm<sup>20</sup>.

335 The study focuses on two native Dipterocarpaceae species, *S. laevis* and *S. leprosula*  
336 (Extended Data Fig. 1a). We logged two individuals from each species (S1 and S2 for *S. laevis* and  
337 F1 and F2 for *S. leprosula*; Fig. 1a) on July 17–18, 2018 and collected samples prior to their  
338 transportation for timber production. Approximately 0.4–1.0 g of leaf tissue was collected from each  
339 of the apices of seven branches and approximately 5 g of cambium tissue was taken from the base of  
340 the stem per individual (Extended Data Fig. 2). To calculate the physical distance between sampling  
341 positions within the tree architecture, we measured the length of each branch (Supplementary Table  
342 2). Samples were promptly preserved in a plastic bag with silica gel following harvest and transported  
343 to the laboratory within 4 days of sampling. During transportation, samples were kept in a cooler box  
344 with ice to maintain a low temperature. Once in the laboratory, samples were stored at –80°C until  
345 DNA and RNA extraction.

346 DBH have been recorded for the trees with DBH greater than 10 cm every two years since  
347 1998 within three census plots of 1 hectare (100 × 100 m) in size located near the target trees. The  
348 mean growth was calculated by taking the average of MAI of DBH for 2 and 18 trees for the slow-  
349 and fast-growing species, respectively (Supplementary Table 1).

350

### 351 **DNA extraction**

352 For short-read sequencing, DNA extraction was performed using a modified version of the method  
353 described previously<sup>35</sup> as follows: Frozen leaves were ground in liquid nitrogen and washed up to  
354 five times with 1 mL buffer (including 100 mM HEPES pH 8.0, 1% PVP, 50 mM Ascorbic acid, 2%  
355 (v/v) β-mercaptoethanol)<sup>36</sup>. DNA was treated with Ribonuclease (Nippongene, Tokyo, Japan)  
356 according to the manufacture's instruction. DNA was extracted twice independently from each  
357 sample for two biological replicates. The DNA yield was measured on a NanoDrop ND-2000  
358 spectrophotometer (Thermo Fisher Scientific, Waltham, MA, USA) and Qubit4 Fluorometer  
359 (Thermo Fisher Scientific). For long-read sequencing, we extracted high molecular weight genomic  
360 DNA from branch 1-1 leaf materials of S1 and F1 individuals using a modified CTAB method<sup>37</sup>.

361

### 362 **RNA extraction and sequencing**

363 For genome annotation, total RNA was extracted from the cambium sample of the S1 individual of  
364 *S. laevis* in accordance with the method described in a previous study<sup>38</sup>. RNA integrity was measured  
365 using the Agilent RNA 6000 Nano kit on a 2100 Bioanalyzer (Agilent Technologies, Santa Clara,  
366 CA, USA), and the RNA yield was determined using a NanoDrop ND-2000 spectrophotometer

367 (Thermo Fisher Scientific). The extracted RNA was sent to Pacific Alliance Lab (Singapore), where  
368 a cDNA library was prepared with a NEBNext<sup>®</sup> Ultra<sup>™</sup> RNA Library Prep Kit for Illumina (New  
369 England BioLabs, Ipswich, MA, USA) and 150 paired-end transcriptome sequencing was conducted  
370 using an Illumina NovaSeq6000 sequencer (Illumina, San Diego, CA, USA). For *S. leprosula*, we  
371 used published RNA-seq data<sup>39</sup>.

372

### 373 **Illumina short-read sequencing and library preparation**

374 For Illumina short-read sequencing, the DNA sample from the first replicate of the S1 individual of  
375 *S. laevis* was sent to the Next Generation Sequencing Facility at Vienna BioCenter Core Facilities  
376 (VBCF), a member of the Vienna BioCenter (VBC) in Austria, for library preparation and sequencing  
377 on the Illumina HiSeq2500 platform (Illumina). The library was prepared using the on-bead  
378 tagmentation library prep method according to the manufacturer's protocol and was individually  
379 indexed with the Nextera index Kit (Illumina) by PCR. Insert size was adjusted to around 450 bp.  
380 The quantity and quality of each amplified library were analyzed using the Fragment Analyzer  
381 (Agilent Technologies) and the HS NGS Fragment Kit (Agilent Technologies).

382 The DNA sample from the second replicate of the S1 individual and two replicates from the  
383 S2, F1, and F2 individuals were sent to Macrogen Inc. (Republic of Korea) for sequencing on the  
384 Illumina HiSeqX platform (Illumina). DNA was sheared to around 500 bp fragments in size using  
385 dsDNA fragmentase (New England BioLabs). Library preparation was performed using the  
386 NEBNext Ultra II DNA Library Prep Kit (New England BioLabs) according to the manufacturer's  
387 protocol, and the libraries were individually indexed with the NEBNext Multiplex Oligos for Illumina  
388 (New England BioLabs) by PCR. The quality and quantity of each amplified library were analyzed  
389 using the Bioanalyzer 2100 (Agilent Technologies), the High Sensitivity DNA kit (Agilent  
390 Technologies), and the NEBNext Library Quant Kit for Illumina (New England BioLabs). In total,  
391 64 samples (16 samples per individual) were used for short-read sequencing.

392

### 393 **PacBio long-read sequencing and library preparation**

394 To construct the reference genome of *S. laevis* and *S. leprosula*, high molecular weight DNA samples  
395 were extracted from branch 1-1 leaf materials of S1 and F2 individuals of each species, and sequenced  
396 using PacBio platforms. For *S. laevis*, library preparation and sequencing were performed at VBCF.  
397 The library was prepared using the SMRTbell express Kit (PacBio, Menlo Park, CA, USA), and  
398 sequenced on the Sequel platform with six SMRT cells (PacBio). For *S. leprosula*, library preparation  
399 and sequencing were performed by Macrogen Inc. (Republic of Korea). The library for *S. leprosula*  
400 was prepared using the HiFi SMARTbell library preparation system (PacBio) according to the  
401 manufacturer's protocol, and was sequenced on the Sequel II platform (PacBio) with one SMRT cell.

402

### 403 **Genome assembly**

404 The PacBio continuous long reads of *S. laevis* were assembled using Flye 2.7-b1587<sup>40</sup> with 12 threads  
405 and with an estimated genome size of 350 Mbp. We subsequently used HyPo v1.0.3<sup>41</sup> for polishing  
406 the contigs. The Illumina read alignments provided to HyPo were created using Bowtie v2.3.4.3<sup>42</sup>

407 with `--very-sensitive` option and using 32 threads. We used the Illumina reads from all branches  
408 of the individual S1 rather than utilizing exclusively those of branch 1-1, in order to capitalize on the  
409 increased aggregate sequencing depth.

410 The PacBio HiFi reads of *S. leprosula* with an average Quality Value (QV) 20 or higher  
411 were extracted, and subsequently assembled using Hifiasm 0.16.1-r375<sup>43</sup>, with `-z10` option and using  
412 40 threads. The primary assembly of *S. leprosula* was used for further analysis. The quality and  
413 completeness of the genome assembly were assessed by searching for a set of 2,326 core genes from  
414 eudicots\_odb10 using BUSCO v5.3.0<sup>44</sup> for each species (Supplementary Table 4).

415

## 416 **Genome annotation**

417 We constructed repeat libraries of *S. laevis* and *S. leprosula* using EDTA v2.0.0<sup>45</sup>. Using the libraries,  
418 we ran RepeatMasker 4.1.2-p1<sup>46</sup> with `-s` option and with `Cross_match` as a search engine, to perform  
419 soft-masking of repetitive sequences in the genomes. The estimated percentages of the repetitive  
420 sequences were 42.4% for *S. laevis* and 39.5% for *S. leprosula* (Supplementary Table 4).

421 We ran BRAKER 2.1.6<sup>47</sup> to perform gene prediction by first incorporating RNA-seq data  
422 and subsequently utilizing a protein database, resulting in the generation of two sets of gene  
423 predictions for each species. To perform RNA-seq-based prediction, we mapped the RNA-seq reads  
424 (see RNA extraction in Methods section) to the genomes using HISAT 2.2.1<sup>48</sup>, with the alignments  
425 subsequently being employed as training data for BRAKER. For protein-based prediction, we used  
426 proteins from the Viridiplantae level of OrthoDB v10<sup>49</sup> as the training data.

427 The two sets of gene predictions were merged using TSEBRA (commit `0e6c9bf` in the  
428 GitHub repository)<sup>50</sup> to select reliable gene predictions for each species. Although in principle  
429 TSEBRA groups overlapping transcripts and considers them as alternative spliced isoforms of the  
430 same gene, we identified instances where one transcript in a gene overlapped with another transcript  
431 in a separate gene. In such cases, we manually clustered these transcripts into the same gene.

432 We used EnTAP 0.10.8<sup>51</sup> with default parameters for functional annotation. The databases  
433 employed were: UniProtKB release 2022\_05<sup>52</sup>, NCBI RefSeq plant proteins release 215<sup>53</sup>, EnTAP  
434 Binary Database v0.10.8<sup>51</sup> and EggNOG 4.1<sup>54</sup>. We constructed the standard gene model by utilizing  
435 the gene predictions of each species, eliminating any gene structures that lacked a complete ORF.  
436 Transcripts containing Ns were also excluded. Following the filtering process, the splice variant  
437 displaying the longest coding sequence (CDS) was selected as the primary isoform for each gene.  
438 The set of primary isoforms was used as the standard gene model.

439

## 440 **Genome size estimation**

441 We estimated genome size of two species using GenomeScope<sup>55</sup>. We counted k-mer from forward  
442 sequence data of branch 1-1 from the S1 and F1 individuals using jellyfish<sup>56</sup> ( $k = 21$ ). The genome  
443 size and heterozygous ratio were estimated by best model fitting. Estimated genome sizes were 347  
444 Mb for the slow-growing species and 376 Mb for the fast-growing species. These estimates were 8%  
445 and 7% smaller than the estimates obtained through flow cytometry<sup>57</sup>, respectively. The genome size

446 of the fast-growing species was nearly identical to that previously reported for *S. leprosula* in  
447 peninsular Malaysia<sup>39</sup>.

448

#### 449 **Somatic (intra-individual) SNV discovery**

450 We filtered low quality reads out and trimmed adapters using fastp v22.0<sup>58</sup> with default settings. The  
451 cleaned reads were mapped to the reference genome using bwa-mem2 22.1<sup>59</sup> with default parameters.  
452 We removed PCR duplicates using fixmate and markdup function of samtools 1.13<sup>60</sup>. The sequence  
453 reads were mapped to the reference genome, yielding average mapping rates of 91.61% and 89.5%  
454 for the slow- and fast-growing species, respectively. To identify reliable SNVs, we utilized two SNP  
455 callers (Bcftools mpileup<sup>60,61</sup> and GATK HaplotypeCaller<sup>62</sup>) and extracted SNVs detected by both  
456 (Extended Data Fig. 2).

457 We first called SNVs with Bcftools 1.13<sup>63</sup> mpileup at three different thresholds; threshold 1  
458 (T40): mapping quality (MQ) = 40, base quality (BQ) = 40; threshold 2 (T30): MQ = 30, BQ = 30;  
459 threshold 3 (T20): MQ = 20, BQ = 20. SNVs detected under each threshold were pooled for further  
460 analyses, with duplicates removed. We normalized indels using bcftools norm for vcf files. We  
461 removed indels and missing data using vcftools 0.1.16<sup>63</sup>.

462 Second, we called SNVs using GATK (4.2.4.0) HaplotypeCaller and merged the individual  
463 gvcfs into a vcf file containing only variant sites. We removed indels from the vcf using the GATK  
464 SelectVariants. We filtered out unreliable SNVs using GATK VariantFiltration with the following  
465 filters; QD (Qual By Depth) < 2.0, QUAL (Base Quality) < 30.0, SOR (Strand Odds Ratio) > 4.0, FS  
466 (Fisher Strand) > 60.0, MQ (RMS Mapping Quality) < 40.0, MQRankSum (Mapping Quality Rank  
467 Sum Test) < -12.5, ReadPosRankSum (Read Pos Rank Sum Test) < -8.0. After performing  
468 independent SNV calling for each biological replicate using each SNP caller, we extracted SNVs that  
469 were detected in both replicates for each SNP caller. We further extracted SNVs that were detected  
470 by both Bcftools mpileup and GATK HaplotypeCaller (Extended Data Fig. 2) using Tassel5<sup>64</sup> and a  
471 custom python script, generating potential SNVs for each threshold. Finally, SNVs detected at any  
472 of the three thresholds were extracted to obtain candidate SNVs. The number of SNVs at each filtering  
473 step can be found in Supplementary Table 6.

474 The candidate SNV calls were manually confirmed by two independent researchers using  
475 the IGV browser<sup>65</sup>. We removed sites from the list of candidates if there were fewer than five high-  
476 quality reads (MQ > 20) in at least one branch sample among the 16 samples, or if the percentage of  
477 high-quality reads was less than 50% of the total mapped reads in at least one branch sample. We  
478 compared the branch-wise pattern with the genotyping call after labeling branches carrying the called  
479 variant as somatic mutation. If the alternative allele was present in all 16 samples, we removed the  
480 site from the list as a fixed site rather than a variant. If the observed pattern did not match the  
481 genotyping call, we disregarded the site from the list of candidates as a variant call error if the  
482 following two conditions were satisfied: (1) the difference between the observed pattern and the  
483 genotyping call was supported by more than one read in either of the two biological replicates or by  
484 only one read in both biological replicates, (2) the alternative (or reference) allele was not present in  
485 one of the two biological replicates but the presence of the allele in another biological replicate was



486 supported by only one read. If IGV detected another allele and the sample carried more than one read  
487 of that allele, we deemed them genotyping errors and disregarded the site from the list of candidates.  
488 The final set of SNVs can be found in Supplementary Table 11. Proportion of false positive and  
489 undetected SNVs for each threshold are illustrated in Extended Data Fig. 4.

490 The NJ tree for each individual was generated using MEGA11<sup>66</sup> based on the matrix of the  
491 number of sites with somatic SNVs present between each pair of branches and edited using FigTree  
492 v1.4.4 (<http://tree.bio.ed.ac.uk/software/figtree/>). Most of the somatic SNVs were heterozygous,  
493 whereas 4% of the total SNVs (46/1136) were homozygous (Supplementary Table 11). The  
494 homozygous sites were treated as a single mutation due to the likelihood of a genotyping error being  
495 higher than the probability of two mutations occurring at the same site. A linear regression analysis  
496 of the number of somatic SNVs against the physical distance between sampling positions within an  
497 individual was conducted using the lm package, with an intercept of zero, in R version 3.6.2.

498

### 499 **Inter-individual SNV discovery**

500 We also identified SNVs between pairs of individuals within each species as inter-individuals SNVs.  
501 The method for calling inter-individual SNVs was the same as for intra-individual SNVs, except that  
502 only threshold 2 (MQ = 30, BQ = 30) for Bcftools 1.13<sup>63</sup> was used. We extracted SNVs that are  
503 present in all branches within an individual using Tassel<sup>64</sup>. To exclude ambiguous SNV calls, we  
504 removed SNVs within 151 bp of indels that were called with Bcftools 1.13<sup>63</sup> with the option of  
505 threshold 2. We eliminated SNVs within 151 bp of sites with a depth value of zero that occur in more  
506 than ten consecutive sites. We also removed SNVs that had a depth smaller than five or larger than  
507  $d + 3\sqrt{d}$ , where  $d$  represents the mean depth of all sites<sup>67</sup>. Due to the large number of candidates for  
508 inter-individual SNVs, the manual checking process was skipped.

509

### 510 **Somatic SNVs confirmation by amplicon sequencing**

511 We verified the reliability of the final set of somatic SNVs by amplicon sequencing approximately  
512 5% of the SNVs in *S. laevis* (31 and 10 SNVs for S1 and S2, respectively). We used multiplexed  
513 phylogenetic marker sequencing method (MPM-seq<sup>68</sup>) with modifications to the protocol as follows:  
514 to amplify 152–280 bp fragments, the first PCR primers comprising tail sequences for the second  
515 PCR primers were designed on the flanking regions of each SNV. The first PCR was conducted using  
516 the Fast PCR cycling kit (Qiagen, Düsseldorf, Germany) under the following conditions: an initial  
517 activation step at 95°C for 5 minutes, followed by 30 cycles of denaturation at 96°C for 5 seconds,  
518 annealing at 50/54/56°C for 5 seconds, and extension at 68°C for 10 seconds. This was followed by  
519 a final incubation at 72°C for 1 minute. Subsequent next-generation sequencing was performed on an  
520 Illumina MiSeq platform using the MiSeq Reagent Kit v2 (300 cycles: Illumina).

521 Amplicon sequencing reads were mapped to the reference genome using bwa-mem2 22.1<sup>59</sup>  
522 with default parameters. Using Bcftools 1.13 mpileup<sup>63</sup>, we called the genotypes of all sites on target  
523 regions and eliminated candidate sequences with MQ and BQ less than 10. The final set of sites  
524 selected for confirmation consisted of 24 for the S1 individual and 9 for the S2 individual. We  
525 manually confirmed the polymorphic patterns at the target sites using the IGV browser<sup>65</sup>. If the

526 alternative allele was present or absent in all eight branches in the amplicon sequence, the site was  
527 determined as fixed. The site was determined as mismatch if the difference of polymorphic patterns  
528 between the somatic SNV calls and amplicon sequence was supported by more than four reads per  
529 branch. The sites that were neither fixed nor mismatched were determined as true. 93.9% (31/33) of  
530 SNVs at the final target sites were confirmed to exhibit a polymorphic pattern that exactly matched  
531 between the somatic SNV calls and amplicon sequence (Supplementary Table 7).

532

### 533 **Mutational spectrum**

534 Mutational spectra were derived directly from the reference genome and alternative alleles at each  
535 variant site. There are a total of six possible classes of base substitutions at each variant site: A:T>G:C  
536 (T>C), G:C>A:T (C>T), A:T>T:A (T>A), G:C>T:A (C>A), A:T>C:G (T>G), and G:C>C:G (C>G).  
537 By considering the bases immediately 5' and 3' to each mutated base, there are a total of 96 possible  
538 mutation classes, referred to as triplets, in this classification. We used seqkit<sup>69</sup> to extract the triplets  
539 for each variant site. To count the number of each triplet, we used the Wordcount tool in the  
540 EMBOSS web service (<https://www.bioinformatics.nl/cgi-bin/emboss/wordcount>). We calculated  
541 the fraction of each mutated triplet by dividing the number of mutated triplets by the total number of  
542 triplets in the reference genome.

543 We compared the mutational signatures of our tropical trees to those of single-base  
544 substitution (SBS) signatures in human cancers using Catalogue Of Somatic Mutations In Cancer  
545 (COSMIC) compendium of mutation signatures (COSMICv.2<sup>26-28</sup>, available at  
546 [https://cancer.sanger.ac.uk/cosmic/signatures\\_v2](https://cancer.sanger.ac.uk/cosmic/signatures_v2)). Cosine similarity was calculated between each  
547 tropical tree species and each SBS signature in human cancers.

548

### 549 **Testing selection of somatic and inter-individual SNVs**

550 To test whether somatic and inter-individual SNVs are subject to selection, we calculated the  
551 expected rate of non-synonymous mutation. For the CDS of length  $L_{\text{cds}}$ , there are possible numbers  
552 of mutations of length of  $3L_{\text{cds}}$  (Extended Data Fig. 5). We classified all possible mutations into three  
553 types based on the codon table: synonymous, missense, and nonsense (Extended Data Fig. 5). Each  
554 type of mutation was counted for each of the six base substitution classes (Extended Data Fig. 5). We  
555 generated count tables based on two distinct categories of CDS: those that included all isoforms and  
556 those that only encompassed primary isoforms (Supplementary Table 12). As the two tables were  
557 largely congruent, we employed the version which included all isoforms of CDS.

558 Using the count table and background mutation rate for each category of substitution class,  
559 we calculated the expected number of synonymous ( $\lambda_S$ ) and non-synonymous mutations ( $\lambda_N$ )  
560 (Extended Data Fig. 5). As a background mutation rate, we adopted the observed somatic mutation  
561 rates in the six substitution classes in the intergenic region (Supplementary Table 13), assuming that  
562 the intergenic region is nearly neutral to selection. Because the number of nonsense somatic mutation  
563 is small, we combined missense and nonsense mutations as non-synonymous. The intergenic regions  
564 were identified as the regions situated between 1 kbp upstream of the start codon and 500 bp  
565 downstream of the stop codon. Expected rate of synonymous mutation ( $p_N$ ) is given as  $\lambda_N/(\lambda_S + \lambda_N)$ .

566 Given the observed number of non-synonymous and synonymous mutations, we rejected the null  
567 hypothesis of neutral selection using a binomial test with the significance level of 5% (Supplementary  
568 Table 10). We used the package `binom.test` in R v3.6.2.

569 We also used the observed somatic mutation rate in the whole genome (Supplementary  
570 Tables 13), including genic and intergenic regions, as the background mutation rate and confirmed  
571 the robustness of our conclusion (Supplementary Tables 10). The somatic mutation rates in the  
572 intergenic region and the whole genome were calculated for each species by pooling the data from  
573 two individuals (Supplementary Tables 13). While cancer genomics studies have accounted for more  
574 detailed context-dependent mutations, such as the high rate of C>T at CpG dinucleotides<sup>70</sup> or  
575 comprehensive analysis of 96 possible substitution classes in triplet context<sup>71</sup>, the number of SNVs  
576 in our tropical trees is too small to perform such a comprehensive analysis. Therefore, we used the  
577 relatively simple six base substitution classes. The genes with somatic SNVs can be found in  
578 Supplementary Table 14.

579

## 580 **Acknowledgements**

581 The authors would like to thank to M. Seki for his assistance with statistical analysis, S.K. Hirota for  
582 his technical support in molecular experiments, and VBC for providing the NGS facility. We also  
583 thank Y. Iwasa, H. Tachida, and M. Nordborg for their insightful comments on the initial draft of our  
584 manuscript.

585

## 586 **Authors contributions**

587 A.S. conceived and designed the analysis; M.N, S.I, W., S.P., N.T., Y.S. and A.S. collected samples;  
588 K.O., I.R., A.M.M., V.M., and Y.S. performed molecular experiments; I.R., E.S., S.T. and A.S.  
589 analyzed data; T.F. and M.K. performed reference genome construction. A.S. leded writing the paper  
590 with input from all authors. This study was funded by JSPS KAKENHI (JP17H06478 to A.S. and  
591 JP22H04925 (PAGS) to M.K.).

592

## 593 **Methods references**

- 594 35. Doyle, J. J. & Doyle, J. L. A rapid DNA isolation procedure for small quantities of fresh leaf  
595 tissue. *Phytochemical Bulletin* **19**, 11–15 (1987).
- 596 36. Toyama, H. *et al.* Effects of logging and recruitment on community phylogenetic structure in  
597 32 permanent forest plots of Kampong Thom, Cambodia. *Philos. Trans. R. Soc. B Biol. Sci.*  
598 **370**, 1–13 (2015).
- 599 37. Doyle, J. *DNA Protocols for Plants in Molecular Techniques in Taxonomy*. (Springer, 1991).
- 600 38. Yeoh, S. H. *et al.* Unravelling proximate cues of mass flowering in the tropical forests of  
601 South-East Asia from gene expression analyses. *Mol. Ecol.* **26**, 5074–5085 (2017).
- 602 39. Ng, K. K. S. *et al.* The genome of *Shorea leprosula* (Dipterocarpaceae) highlights the  
603 ecological relevance of drought in aseasonal tropical rainforests. *Commun. Biol.* **4**, 1–14  
604 (2021).

- 605 40. Kolmogorov, M., Yuan, J., Lin, Y. & Pevzner, P. A. Assembly of long, error-prone reads  
606 using repeat graphs. *Nat. Biotechnol.* **37**, (2019).
- 607 41. Kundu, R., Casey, J. & Sung, W.-K. HyPo: Super cast & accurate polisher for long read  
608 genome assemblies. *bioRxiv* (2019).
- 609 42. Langmead, B. & Salzberg, S. L. Fast gapped-read alignment with Bowtie 2. *Nat. Methods* **9**,  
610 357–359 (2012).
- 611 43. Cheng, H., Concepcion, G. T., Feng, X., Zhang, H. & Li, H. Haplotype-resolved *de novo*  
612 assembly using phased assembly graphs with hifiasm. *Nat. Methods* **18**, 170–175 (2021).
- 613 44. Manni, M., Berkeley, M. R., Seppey, M., Simão, F. A. & Zdobnov, E. M. BUSCO update:  
614 Novel and streamlined workflows along with broader and deeper phylogenetic coverage for  
615 scoring of eukaryotic, prokaryotic, and viral genomes. *Mol. Biol. Evol.* **38**, 4647–4654  
616 (2021).
- 617 45. Vurture, G. W. *et al.* GenomeScope: Fast reference-free genome profiling from short reads.  
618 *Bioinformatics* **33**, 2202–2204 (2017).
- 619 46. Marçais, G. & Kingsford, C. A fast, lock-free approach for efficient parallel counting of  
620 occurrences of k-mers. *Bioinformatics* **27**, 764–770 (2011).
- 621 47. Ng, C. H. *et al.* Genome size variation and evolution in DipteroCarpaceae. *Plant Ecol.*  
622 *Divers.* **9**, 437–446 (2016).
- 623 48. Ou, S. *et al.* Benchmarking transposable element annotation methods for creation of a  
624 streamlined, comprehensive pipeline. *Genome Biol.* **20**, 275 (2019).
- 625 49. Zdobnov, E. M. *et al.* OrthoDB in 2020: Evolutionary and functional annotations of  
626 orthologs. *Nucleic Acids Res.* **49**, D389–D393 (2021).
- 627 50. Smit, A., Hubley, R. & Green, P. RepeatMasker Open-4.0. <http://www.repeatmasker.org>
- 628 51. Brůna, T., Hoff, K. J., Lomsadze, A., Stanke, M. & Borodovsky, M. BRAKER2: Automatic  
629 eukaryotic genome annotation with GeneMark-EP+ and AUGUSTUS supported by a protein  
630 database. *NAR Genomics Bioinforma.* **3**, lqaa108 (2021).
- 631 52. Kim, D., Paggi, J. M., Park, C., Bennett, C. & Salzberg, S. L. Graph-based genome  
632 alignment and genotyping with HISAT2 and HISAT-genotype. *Nat. Biotechnol.* **37**, 907–915  
633 (2019).
- 634 53. Gabriel, L., Hoff, K. J., Brůna, T., Borodovsky, M. & Stanke, M. TSEBRA: transcript  
635 selector for BRAKER. *BMC Bioinformatics* **22**, 566 (2021).
- 636 54. Hart, A. J. *et al.* EnTAP: Bringing faster and smarter functional annotation to non-model  
637 eukaryotic transcriptomes. *Mol. Ecol. Resour.* **20**, 591–604 (2020).
- 638 55. Bateman, A. *et al.* UniProt: the universal protein knowledgebase in 2021. *Nucleic Acids Res.*  
639 **49**, D480–D489 (2021).
- 640 56. O’Leary, N. A. *et al.* Reference sequence (RefSeq) database at NCBI: Current status,  
641 taxonomic expansion, and functional annotation. *Nucleic Acids Res.* **44**, D733–745 (2016).
- 642 57. Powell, S. *et al.* EggNOG v4.0: Nested orthology inference across 3686 organisms. *Nucleic*  
643 *Acids Res.* **42**, D231–D239 (2014).

- 644 58. Chen, S., Zhou, Y., Chen, Y. & Gu, J. Fastp: An ultra-fast all-in-one FASTQ preprocessor.  
645 *Bioinformatics* **34**, i884–i890 (2018).
- 646 59. Vasimuddin, M., Sanchit, M., Heng, L. & Srinivas, A. Efficient architecture-aware  
647 acceleration of BWA-MEM for multicore systems. *Proc. 2019 IEEE 33rd Int. Parallel*  
648 *Distrib. Process. Symp. IPDPS* 314–324 (2019).
- 649 60. Li, H. *et al.* The Sequence Alignment/Map format and SAMtools. *Bioinformatics* **25**, 2078–  
650 2079 (2009).
- 651 61. Li, H. A statistical framework for SNP calling, mutation discovery, association mapping and  
652 population genetical parameter estimation from sequencing data. *Bioinformatics* **27**, 2987–  
653 2993 (2011).
- 654 62. McKenna, A. *et al.* The genome analysis toolkit: A MapReduce framework for analyzing  
655 next-generation DNA sequencing data. *Genome Res.* **20**, 1297–12303 (2010).
- 656 63. Danecek, P. *et al.* Twelve years of SAMtools and BCFtools. *Gigascience* **10**, 1–4 (2021).
- 657 64. Bradbury, P. J. *et al.* TASSEL: Software for association mapping of complex traits in diverse  
658 samples. *Bioinformatics* **23**, 2633–2635 (2007).
- 659 65. Robinson, J. T., Thorvaldsdóttir, H., Wenger, A. M., Zehir, A. & Mesirov, J. P. Variant  
660 review with the integrative genomics viewer. *Cancer Research* **77**, e31–e34 (2017).
- 661 66. Tamura, K., Stecher, G. & Kumar, S. MEGA11: Molecular evolutionary genetics analysis  
662 version 11. *Mol. Biol. Evol.* **38**, 3022–3027 (2021).
- 663 67. Li, H. & Wren, J. Toward better understanding of artifacts in variant calling from high-  
664 coverage samples. *Bioinformatics* **30**, 2843–2851 (2014).
- 665 68. Suyama, Y. *et al.* Complementary combination of multiplex high-throughput DNA  
666 sequencing for molecular phylogeny. *Ecol. Res.* **37**, 171–181 (2022).
- 667 69. Shen, W., Le, S., Li, Y. & Hu, F. SeqKit: A cross-platform and ultrafast toolkit for  
668 FASTA/Q file manipulation. *PLoS One* **11**, e0163962 (2016).
- 669 70. Greenman, C., Wooster, R., Futreal, P. A., Stratton, M. R. & Easton, D. F. Statistical analysis  
670 of pathogenicity of somatic mutations in cancer. *Genetics* **173**, 2187–2198 (2006).
- 671 71. Martincorena, I. *et al.* Universal patterns of selection in cancer and somatic tissues. *Cell* **171**,  
672 1029–1041.e21 (2017).

673

#### 674 **Competing interest**

675 The authors declare that they have no competing financial and non-financial interests.

676

677

**a**

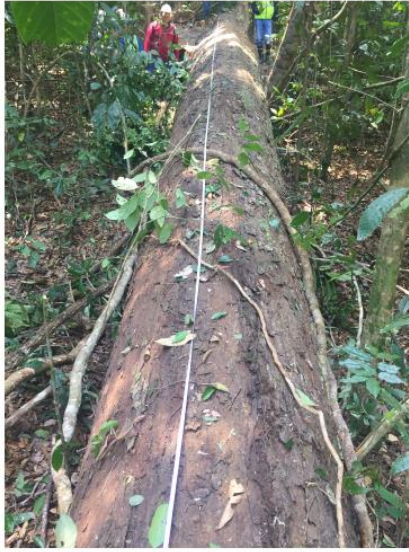

*Shorea laevis*

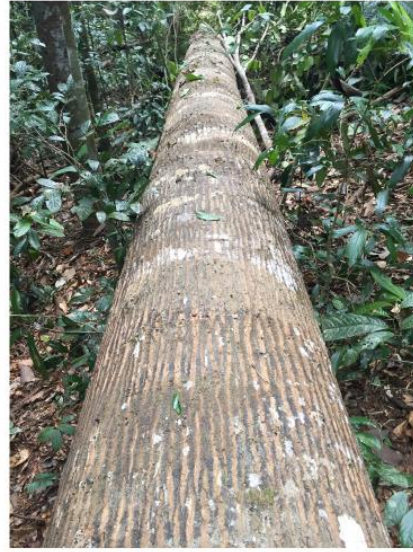

*Shorea leprosula*

**b**

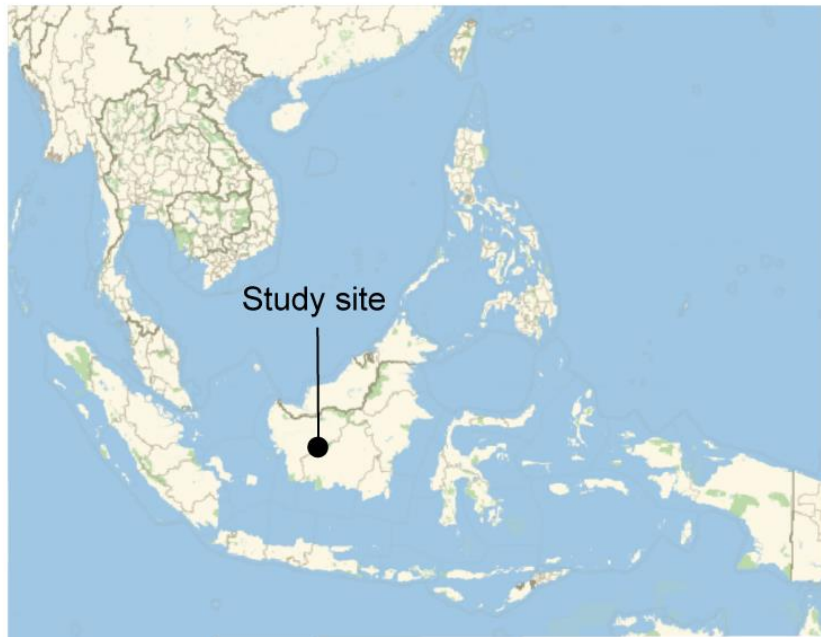

678

679

680 **Extended Data Fig. 1 | Target tropical trees and location of study site.** **a**, Images of *S. laevis* (S1),  
681 a slow-growing species, and *S. leprosula* (F1), a fast-growing species. **b**, Location of the study site  
682 in central Borneo, Indonesia.

683

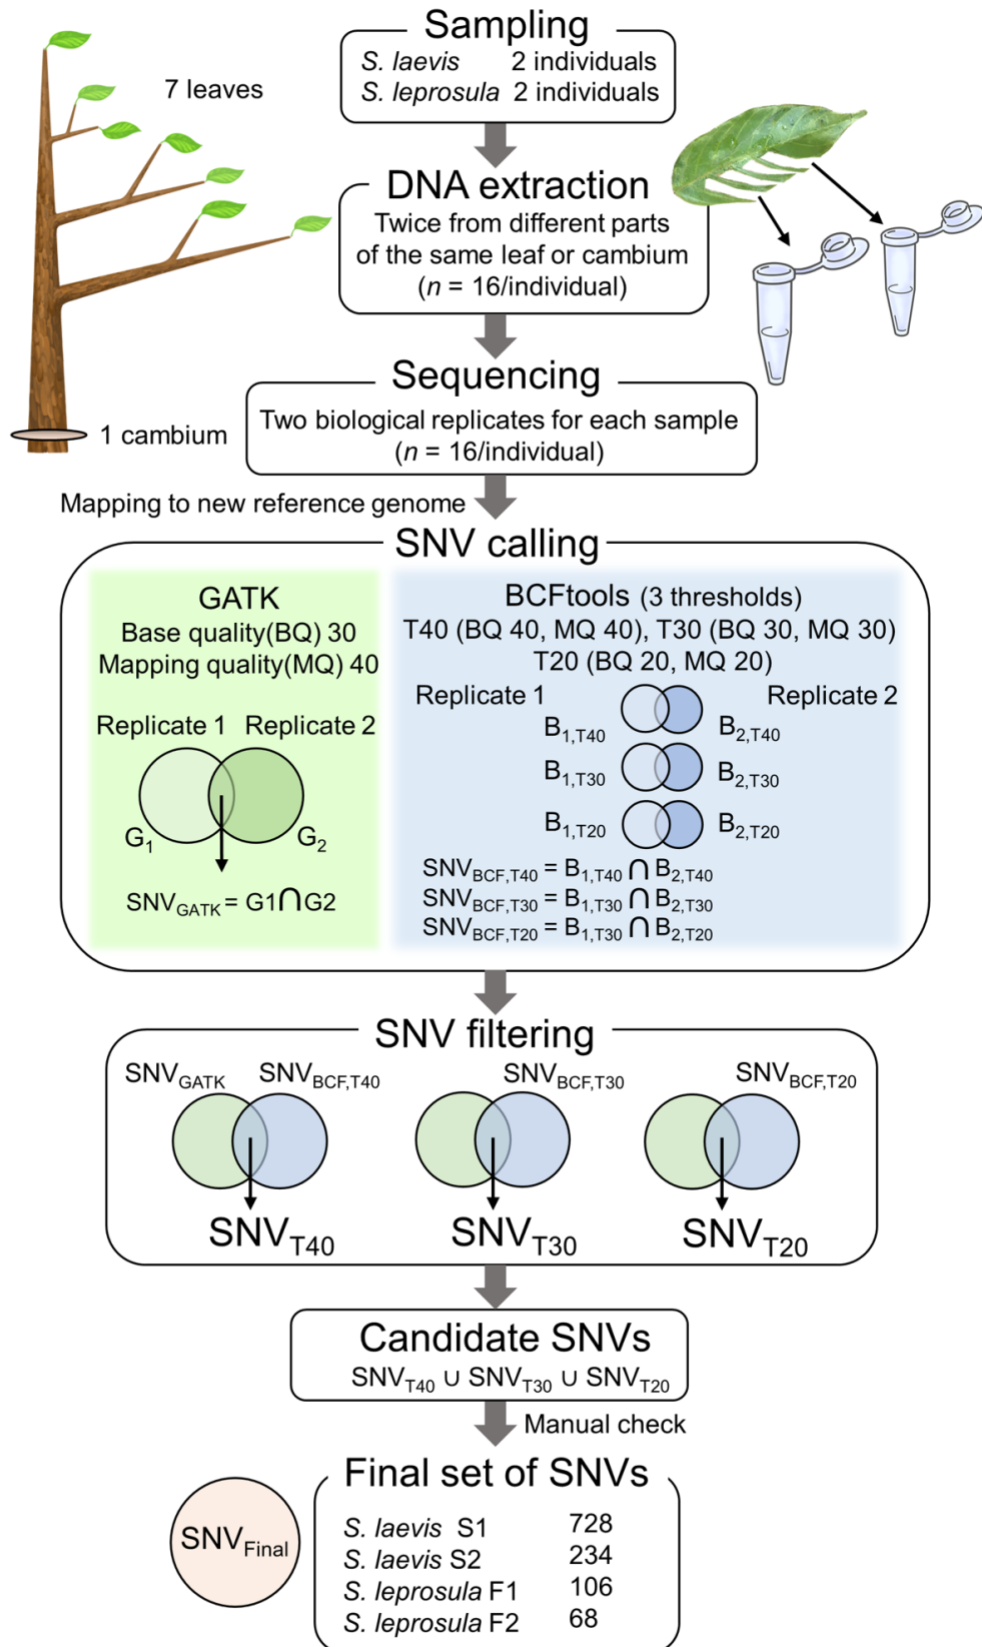

684

685

686 **Extended Data Fig. 2 | Workflow for identifying *de novo* somatic SNVs.** 8 samples (seven leaves  
687 and one cambium) were collected from four trees (two trees from each species). DNA was extracted  
688 twice independently from each sample and sequenced independently. Reads were mapped to the  
689 reference genome and used for SNV calling and filtering. SNVs over 8 samples were called using  
690 GATK HaplotypeCaller (GATK) and Bcftools mpileup (BCF tools) for each set of biological  
691 replicates from 7 branches and 1 cambium independently, generating potential SNVs for each set of  
692 replicates and for each SNP caller ( $G_1$  and  $G_2$  for GATK,  $B_1$  and  $B_2$  for BCF tools). For BCF tools,  
693 we set three thresholds (T40, T30, and T20) with different base quality (BQ) and mapping quality  
694 (MQ). SNVs detected in both replicates were extracted for each SNP callers and generated potential  
695 SNVs for each SNP caller,  $SNV_{GATK}$  for GATK and  $SNV_{BCF}$  for Bcftools with three thresholds.  
696 These SNVs were filtered by extracting SNVs detected in both SNP callers, generating potential  
697 SNVs for each threshold:  $SNV_{T40}$ ,  $SNV_{T30}$ , and  $SNV_{T20}$ . Finally, SNVs detected at any of the three  
698 thresholds were extracted to obtain candidate SNVs. We checked the candidate SNVs manually and  
699 obtained a final set of SNVs,  $SNV_{Final}$ .

700



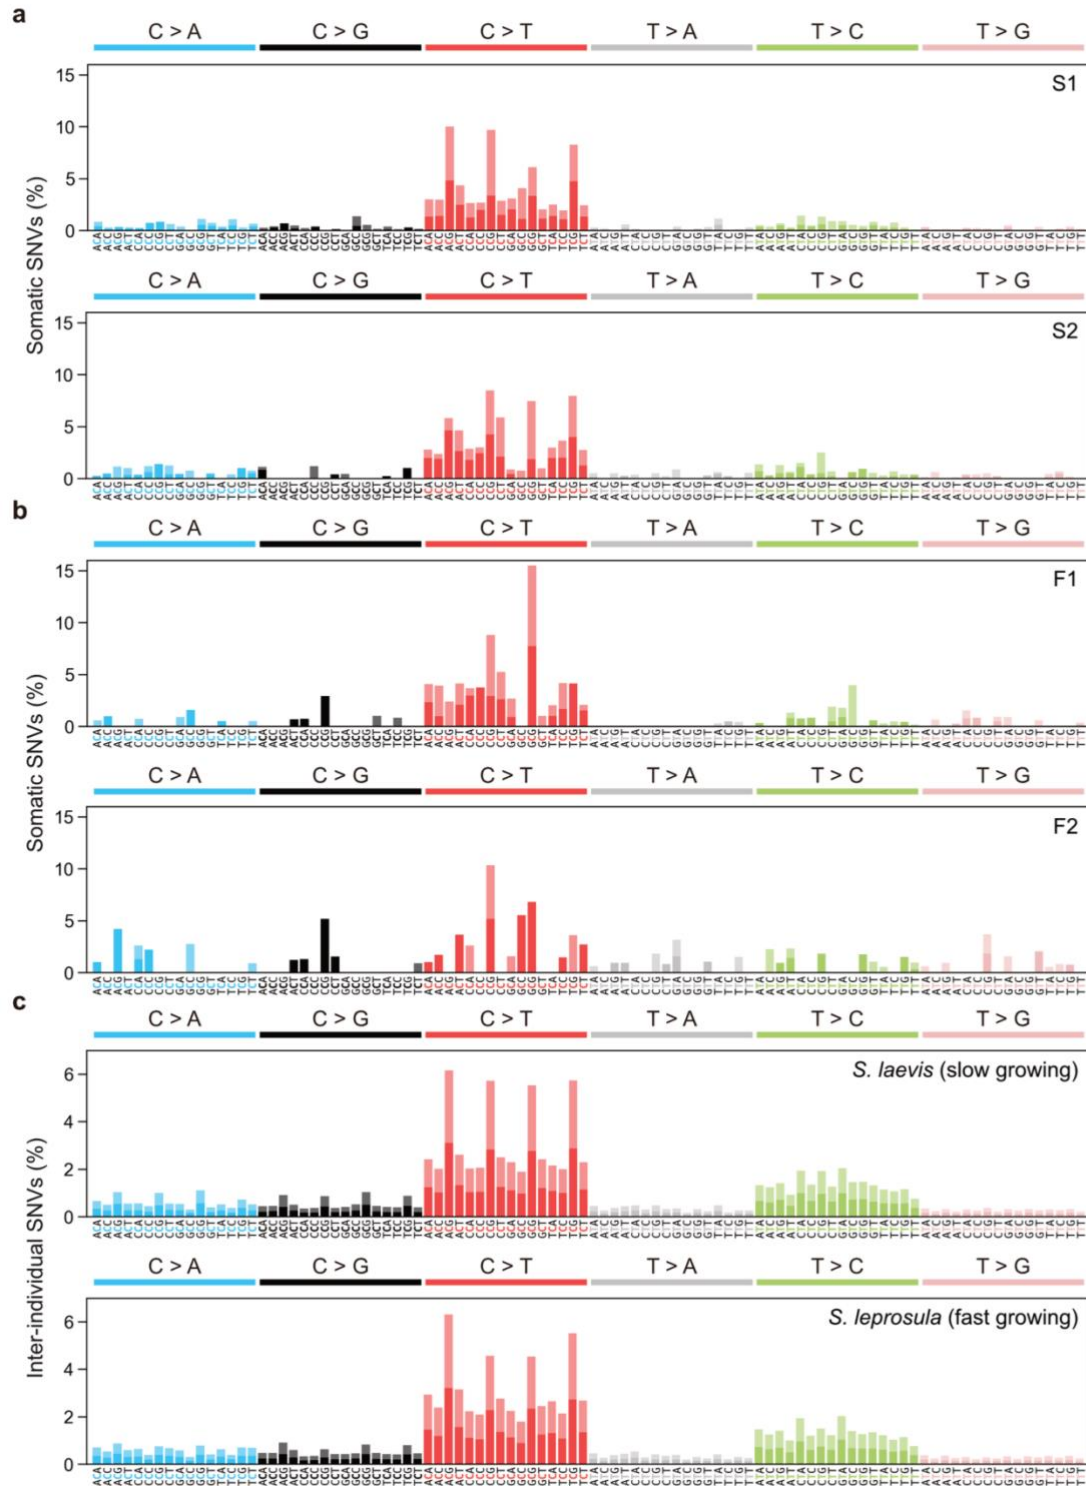

701

702 **Extended Data Fig. 3 | Mutational spectra of somatic and inter-individual substitutions in each**  
703 **tree. a**, Somatic mutation spectra for S1 and S2 individuals in *S. laevis*. **b**, Somatic mutation spectra  
704 for F1 and F2 individuals in *S. leprosula*. **c**, Inter-individual SNVs between S1 and S2 (upper panel)  
705 and between F1 and F2 (lower panel). The horizontal axis shows 96 mutation types on a trinucleotide  
706 context, coloured by base substitution type. Different colours in each bar indicate complementary  
707 bases.

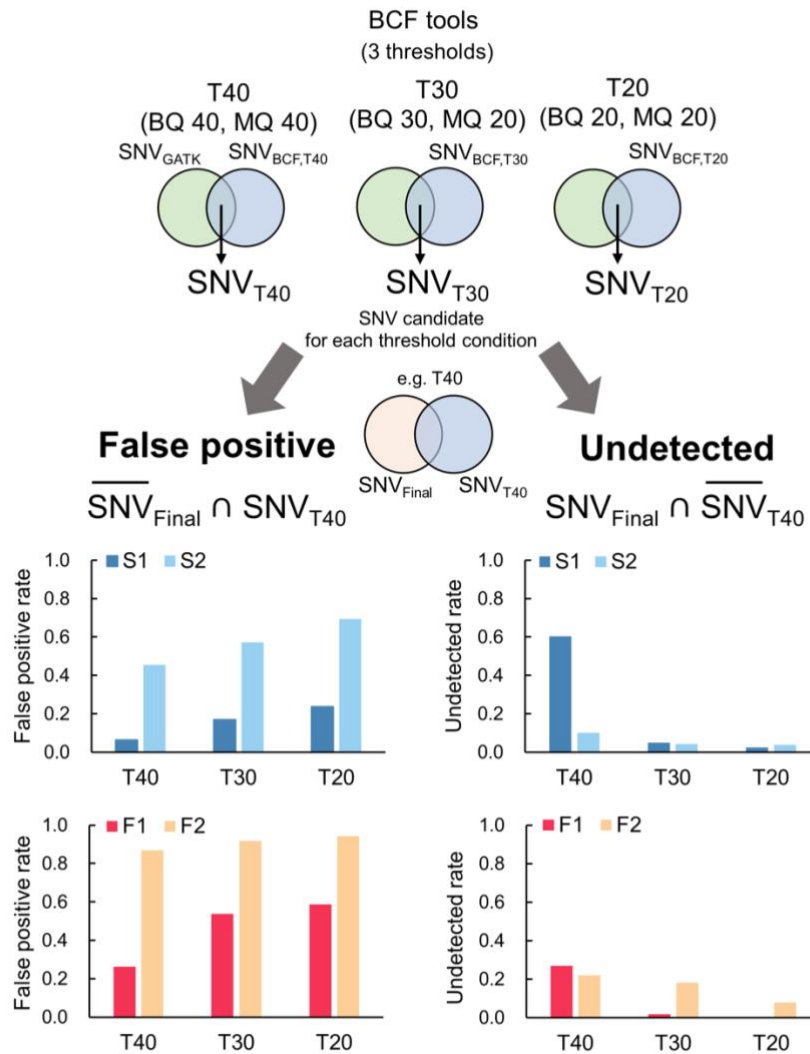

708

709 **Extended Data Fig. 4 | Proportion of false positive and undetected SNVs.** Proportion of false  
 710 positive SNVs were calculated by extracting the subset of potential SNVs that were not included in  
 711 the final set for each threshold and dividing by the total number of potential SNVs for each threshold.  
 712 Proportion of undetected SNVs were calculated by extracting the subset of potential SNVs that were  
 713 included in the final set but not included in the potential SNVs for each threshold, and by dividing  
 714 the total number of potential SNVs for each threshold.

715

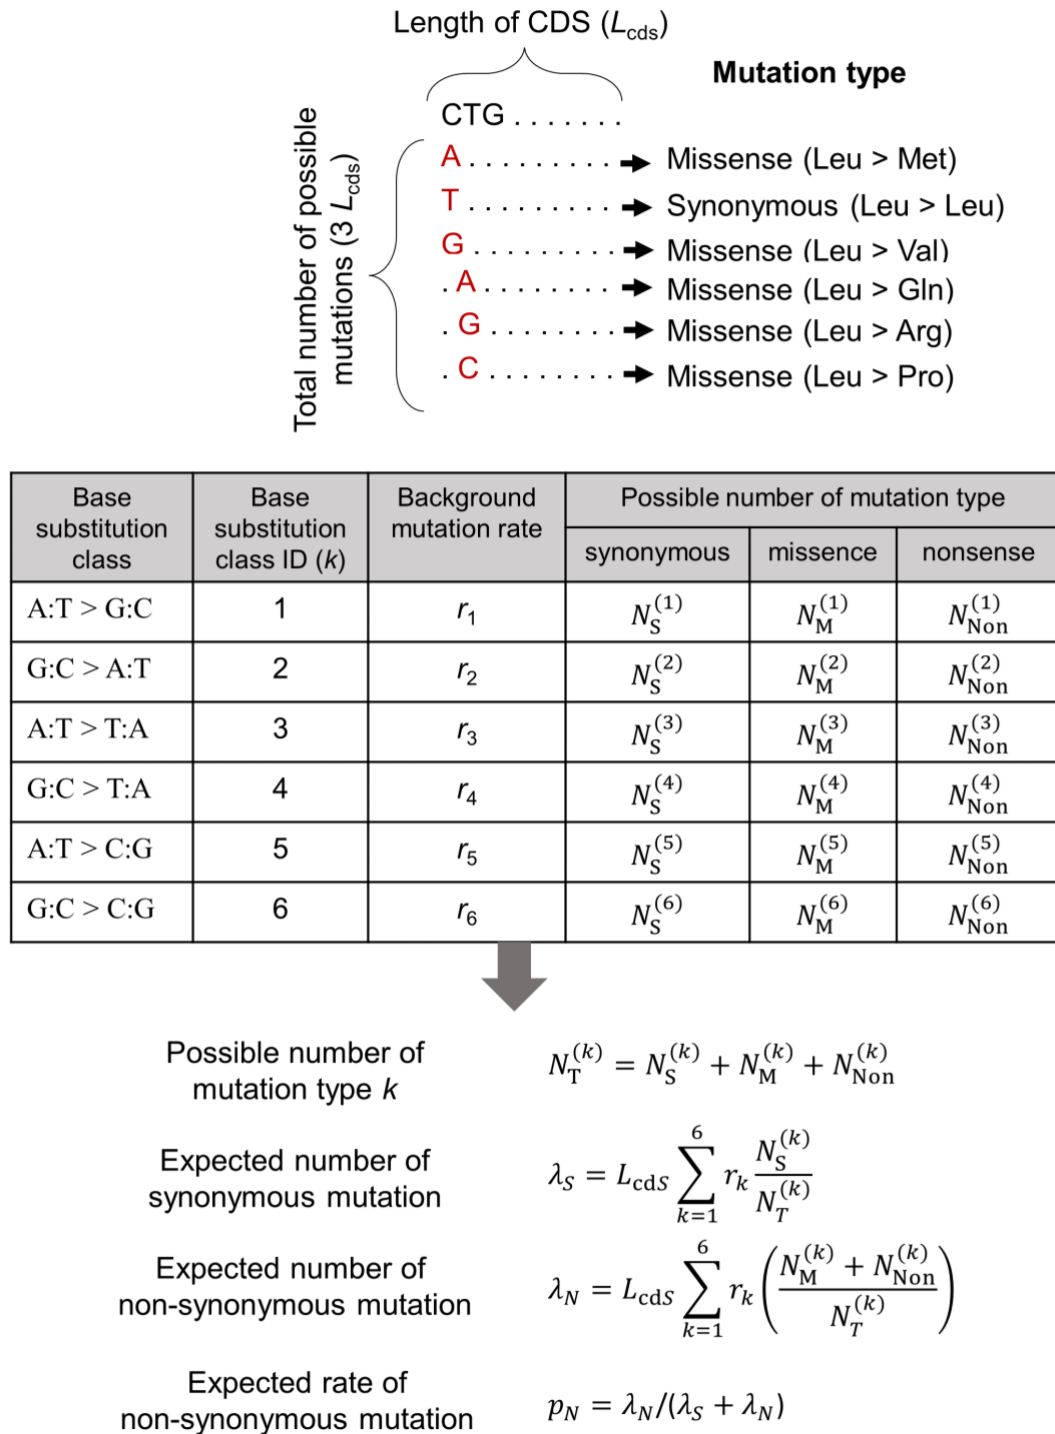

716

717 **Extended Data Fig. 5 | A calculation scheme for the expected rate of non-synonymous mutation.**

718 The possible numbers of synonymous ( $N_S$ ), missense ( $N_M$ ), and nonsense ( $N_{\text{Non}}$ ) mutations were  
 719 counted for each of six base substitution classes from all possible mutations in CDS of length  $L_{\text{cds}}$   
 720 and used for the calculation of expected rate of non-synonymous mutation. For non-synonymous  
 721 mutation, we pooled the number for missense and nonsense mutations. The background mutation rate  
 722 for each substitution class  $i$  ( $r_i$ ) is calculated from the observed somatic substitutions in intergenic  
 723 regions.
